# Supplementary material for: Rational design of supramolecular chirality in porphyrin assemblies: the halogen bond case
Source: Royal Society of Chemistry journal article supplement (doi:10.1039/b719625c), 2008-01-01
Supplement: b719625c.pdf [file b719625c.pdf]

## Rational Design of Supramolecular Chirality in Porphyrin Assemblies: The Halogen Bond Case

Sankar Muniappan, Sophia Lipstman, and Israel Goldberg\*

*School of Chemistry, Sackler Faculty of Exact Sciences, Tel Aviv University, Ramat Aviv, 69978 Tel Aviv, Israel*

### Experimental Supplementary Information

#### Preparative Details

*Synthesis of PyTIPP.* 1.25g (5.4 mmol) of 4-iodobenzaldehyde, 0.34ml (3.6 mmol) of 4-pyridinecarboxaldehyde were added to 35 ml of hot propionic acid at 120 °C. Then 0.5 ml of distilled pyrrole (7.21 mmol) was added and the resulting solution heated to refluxing for 90 minutes. The solvent was then removed by vacuum distillation and the crude product was digested with hot water to remove traces of propionic acid, filtered, washed with water and dried. The crude porphyrin mixture was dissolved in chloroform and loaded on silica column using chloroform. The desired porphyrin, PyTIPP, was eluted with 3% acetone in chloroform as second fraction. The yield was found to be 0.165 g (9%) based on pyrrole. <sup>1</sup>H NMR (CDCl<sub>3</sub>): 9.00 (dd, 2H, J = 5.9 Hz), 8.80 (m, 8H), 8.10 (asymmetric t, 8H, J = 6 Hz, J = 8.6 Hz), 7.89 (d, 6H, J = 8.2 Hz), -2.93 (s, 2H). UV-Vis in CH<sub>2</sub>Cl<sub>2</sub>: λ<sub>max</sub>, nm (logε) 419(5.96), 515(4.60), 549(4.18), 589(4.01), 645(3.72). FAB-mass spectrum (m/z) for C<sub>43</sub>H<sub>26</sub>N<sub>5</sub>I<sub>3</sub>: found 994, Calcd. 993.43.

*Preparation of metal derivatives.* The free-base porphyrin (0.05g, 5.03 mmol) was dissolved in 25 ml of CHCl<sub>3</sub>. To this, M(OAc)<sub>2</sub> hydrate where M = Cu(II) and Zn(II) (0.09 – 0.125g, 0.05 mol) in 2ml of methanol was added and heated for 10 minutes on water bath at 75 °C and evaporated to dryness. The crude porphyrin was washed with water. The metal complexes were dried under vacuum and their yields were found to be almost quantitative. [Zn-PyTIPP]: <sup>1</sup>H NMR (DMSO-d<sub>6</sub>): 8.98 (d, 2H, J = 5.8 Hz), 8.79 (m, 8H), 8.16 (asymmetric t, 8H, J = 5.76 Hz, J = 8.2 Hz), 7.94 (d, 6H, J = 8.2 Hz). UV-Vis. in CH<sub>2</sub>Cl<sub>2</sub>/pyridine mixture: λ<sub>max</sub>, nm (logε) 429(5.69), 562(4.15), 602(3.69). FAB-mass spectrum (m/z) for C<sub>43</sub>H<sub>24</sub>N<sub>5</sub>I<sub>3</sub>Zn: found 1057, Calcd. 1056.8. [Cu-PyTIPP]: UV-Vis. in CH<sub>2</sub>Cl<sub>2</sub>/pyridine mixture: λ<sub>max</sub>, nm (logε) 416(5.82), 540(4.37), 589(4.18). FAB-mass spectrum (m/z) for C<sub>43</sub>H<sub>24</sub>N<sub>5</sub>I<sub>3</sub>Cu: found 1055, Calcd. 1054.96.

*Supramolecular synthesis.* 4 mg (0.004 mmol) of PyTIPP were dissolved in 2 ml of chloroform followed by few drops of either nitrobenzene or ethyl benzoate, and allowed to evaporate slowly. X-ray quality crystals of the nitrobenzene solvate (structure 1) were obtained after one week. When ~4 mg (0.004 mmol) of [Zn-PyTIPP] and [Cu-PyTIPP] were dissolved in 1.5 ml of 2:1 mixture of DMF/pyridine (v/v) and allowed to evaporate slowly, X-ray quality crystals of the DMF solvate of [Zn(py)-PyTIPP] (structure 2) and pyridine solvate of [Cu-PyTIPP] (structure 3) were obtained after ten days. The uniform identity of the formed crystal lattices in a given reaction was confirmed in each case by repeated measurements of the unit-cell dimensions from different single crystallites.

### Summary of the crystallographic details

**Crystal Data:** **1:** C<sub>43</sub>H<sub>26</sub>I<sub>3</sub>N<sub>5</sub>·2C<sub>6</sub>H<sub>5</sub>NO<sub>2</sub>, M<sub>r</sub> = 1239.61, triclinic, space group P1, a = 10.6814(3), b = 11.1396(3), c = 11.4818(4) Å, α = 103.635(1), β = 93.441(1), γ = 110.096(2)°, V = 1231.87(6) Å<sup>3</sup>, T = 110 K, Z = 1, μ(MoKα) = 19.57 cm<sup>-1</sup>, ρ<sub>calcd</sub> = 1.671 g·cm<sup>-3</sup>, 13768 reflections measured of which 9381 were unique (R<sub>int</sub> = 0.046) and 7890 with I > 2σ(I). Final R1 = 0.042 and wR2 = 0.084 for the 7890 data above the intensity threshold.

**2:** C<sub>48</sub>H<sub>29</sub>I<sub>3</sub>N<sub>6</sub>Zn·C<sub>3</sub>H<sub>7</sub>NO, M<sub>r</sub> = 1208.94, triclinic, space group P1, a = 15.9721(4), b = 17.4838(4), c = 18.8968(5) Å, α = 66.985(1), β = 86.963(1), γ = 75.270(1)°, V = 4690.9(2) Å<sup>3</sup>, T = 110 K, Z = 4, μ(MoKα) = 25.44 cm<sup>-1</sup>, ρ<sub>calcd</sub> = 1.712 g·cm<sup>-3</sup>, 39597 reflections measured of which 29624 were unique (R<sub>int</sub> = 0.066) and 20744 with I > 2σ(I). Final R1 = 0.067 and wR2 = 0.159 for the 20744 data above the intensity threshold.

**3:** C<sub>43</sub>H<sub>24</sub>CuI<sub>3</sub>N<sub>5</sub> (excluding disordered solvent), M<sub>r</sub> = 1054.91, monoclinic, space group C2, a = 24.2489(13), b = 20.5698(11), c = 9.1014(5) Å, β = 94.477(4)°, V = 4525.9(4) Å<sup>3</sup>, T = 110 K, Z = 4, μ(MoKα) = 25.61 cm<sup>-1</sup>, ρ<sub>calcd</sub> = 1.548 g·cm<sup>-3</sup>, 20122 reflections measured of which 10024 were unique (R<sub>int</sub> = 0.066) and 7222 with I > 2σ(I). Final R1 = 0.060 and wR2 = 0.149 for the 7222 data above the intensity threshold. In structure **3** the contribution of the disordered solvent was subtracted from the diffraction pattern (A. L. Spek, *J. Appl. Crystallogr.* **2003**, *36*, 7-13). All the three analysed crystals were found to be twins of varying composition of inter-grown domains of opposing chirality: 1:1 (**1**), 1:9 (**2**) and ~1:2.5 (**3**).

CCDC reference numbers 662252 (**1**), 662254 (**2**) and 662255 (**3**).

All three crystal structures are pseudo-centrosymmetric and the molecular frameworks in them arrange nearly in a centrosymmetric manner (including pseudo-inverted arrangements of the 5-coordinate [Zn(py)-PyTIPP] entities, but not quite. It is the asymmetric disposition of the iodine atom between the halogen-bonded pyridyl and iodophenyl groups that makes the difference; the iodine is distanced 2.8-3.0 Å from the N-site it points at, but only ~2.1 Å from the C(phenyl)-atom it covalently binds to.

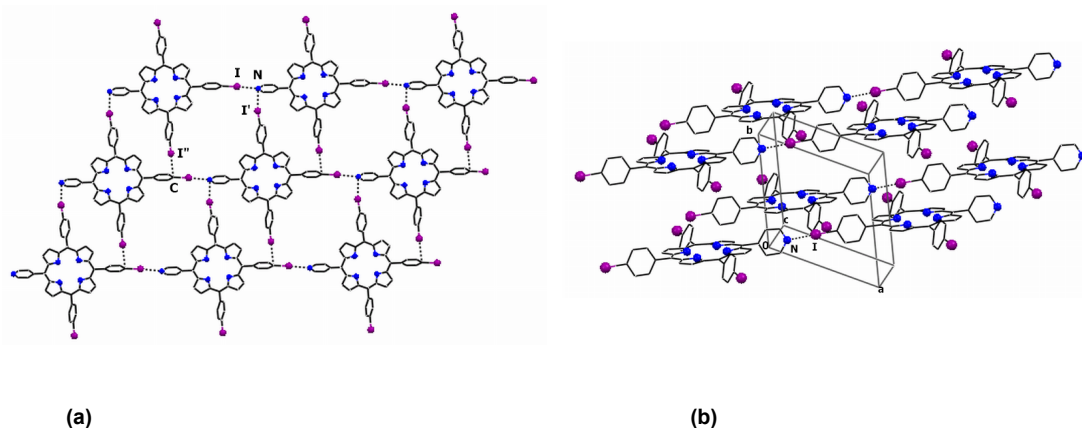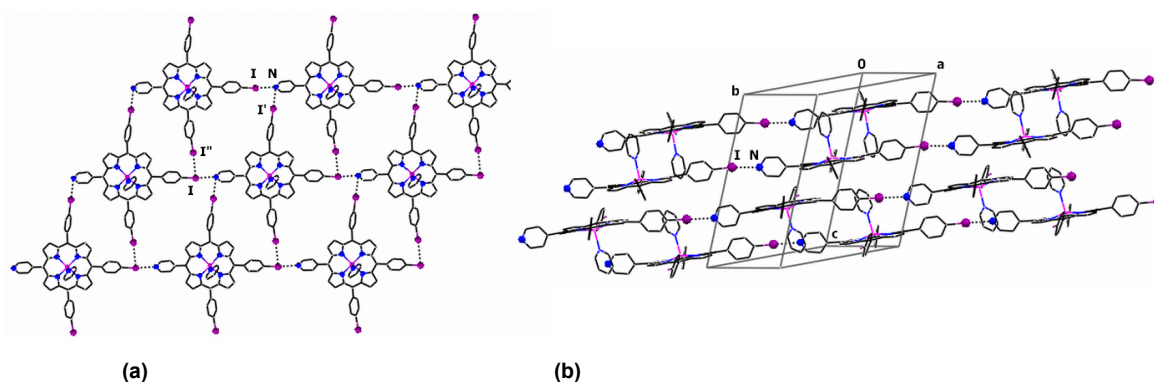

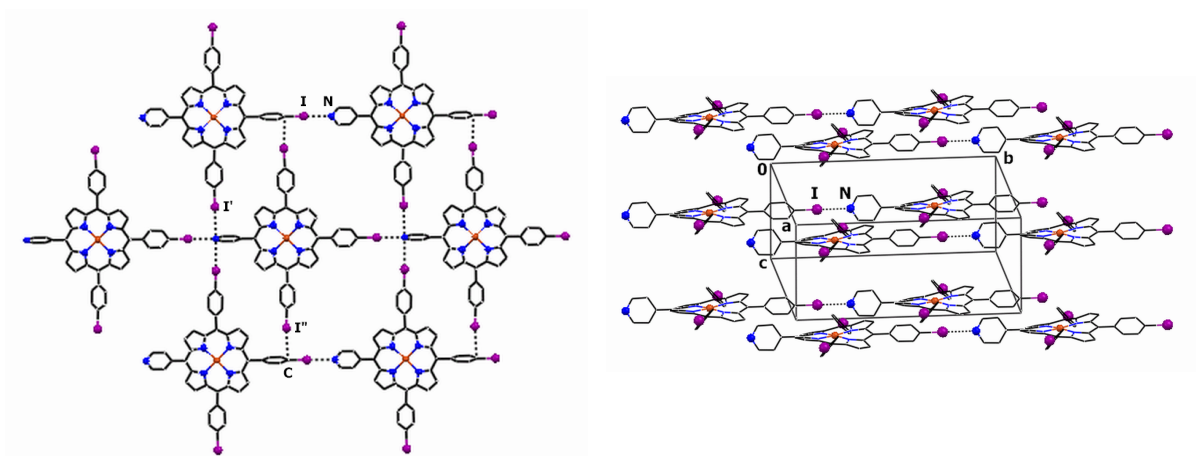

(a)

(b)

(a) Supramolecular layered assembly of [Cu-PyTIPP] in **3**. The I...N dashed contact indicates the halogen bond, while the I'...N and I''...C contacts represent the perpendicular I... $\pi$  interactions. Optimization of these interactions and formation of the layered molecular grids is associated in this structure with severe saddle-type deformation of the porphyrin core from planarity into a chiral form. The porphyrin molecules are located on the axes of twofold rotation, and the asymmetric unit comprises *two* crystallographically independent halves of the porphyrin species.

(b) Unidirectional arrangement of successive layers in the crystal structure **3** in space group C2; only the N...I halogen bonds are marked by dashed lines.
